# Supplementary material for: Transcriptome characterization via 454 pyrosequencing of the annelid Pristina leidyi, an emerging model for studying the evolution of regeneration
Source: PubMed Central journal article supplement (PMC3464666; doi:10.1186/1471-2164-13-287), 2012-06-29
Supplement: 1471-2164-13-287-S1.pdf [file 1471-2164-13-287-S1.pdf]

### **Additional File 1 – Genome sizes of five naid species**

| <b>Naidine species</b>        | <b>C-value (pg)</b> |
|-------------------------------|---------------------|
| <i>Pristina leidy</i>         | 1.37                |
| <i>Allonais paraguayensis</i> | 0.69                |
| <i>Dero digitata</i>          | 0.54                |
| <i>Dero furcata</i>           | 0.77                |
| <i>Paranais litoralis</i>     | 1.09                |
