# Supplementary material for: Transcriptome characterization via 454 pyrosequencing of the annelid Pristina leidyi, an emerging model for studying the evolution of regeneration
Source: PubMed Central journal article supplement (PMC3464666; doi:10.1186/1471-2164-13-287), 2012-06-29

**Additional File 2 – PCR assay for metabolic activity in dried Spirulina food**

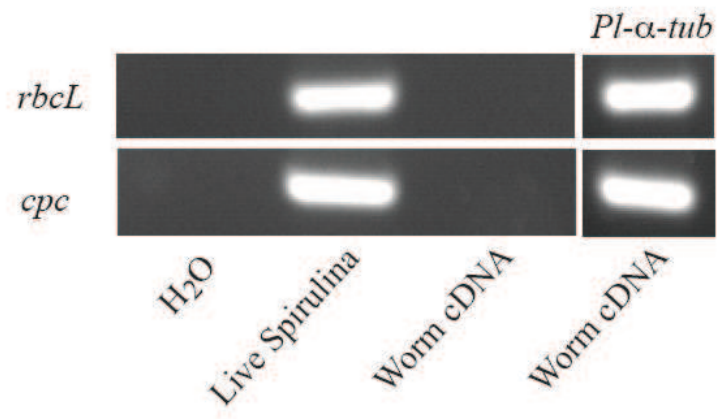

Supplement: 1471-2164-13-287-S2.pdf [file 1471-2164-13-287-S2.pdf]
