# Supplementary material for: Transcriptome characterization via 454 pyrosequencing of the annelid Pristina leidyi, an emerging model for studying the evolution of regeneration
Source: PubMed Central journal article supplement (PMC3464666; doi:10.1186/1471-2164-13-287), 2012-06-29

### Additional File 3 – Gene Ontology Molecular Function and Cellular Component designations of isotigs

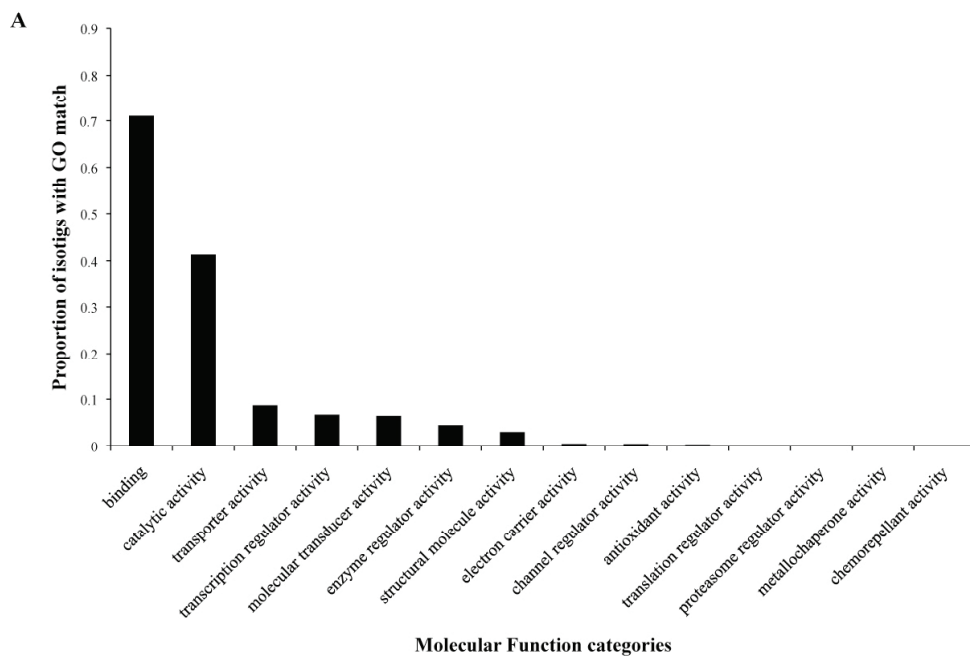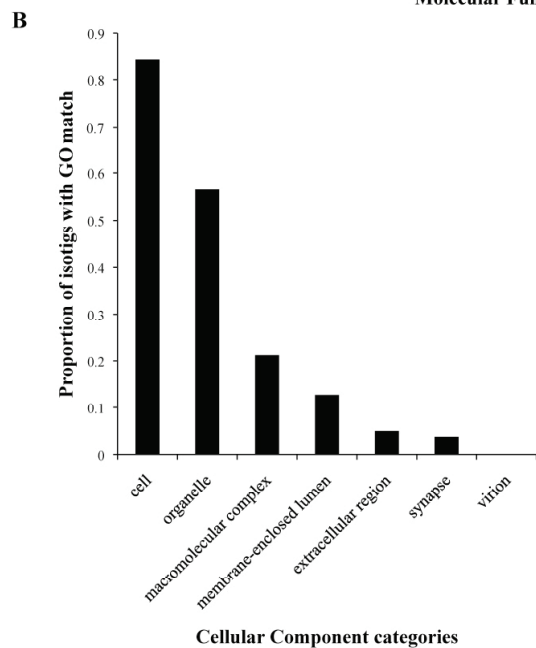

Supplement: 1471-2164-13-287-S3.pdf [file 1471-2164-13-287-S3.pdf]
