# Supplementary material for: Transcriptome characterization via 454 pyrosequencing of the annelid Pristina leidyi, an emerging model for studying the evolution of regeneration
Source: PubMed Central journal article supplement (PMC3464666; doi:10.1186/1471-2164-13-287), 2012-06-29
Supplement: 1471-2164-13-287-S4.pdf [file 1471-2164-13-287-S4.pdf]

## Additional File 4 – Nucleotide alignments for isogroups 08478 and 03233

### A Isogroup08478 – putative *piwi-like* gene

```
isotig33900   ATAATCCAGGCAAATCAACGATCATACACTTACAACCAGGACACGGCTGATTGGTCGAAA
isotig33901   ATAATCCAGGCAAATCAACGATCATACACTTACAACCAGGACACGGCTGATTGGTCGAAA
*****

isotig33900   GAGATGAGAGGACTACCCCTGCTGAACCCAGCCCATCTAACCAACTGGGTACTCATCTAC
isotig33901   GAGATGAGAGGACTACCCCTGCTGAACCCAGCCCATCTAACCAACTGGGTACTCATCTAC
*****

isotig33900   ACGAGTCGAGATGCTGGCAATGCAAGTGACCTGAGTTCAACACTAGTGAAAGTCTGTCAG
isotig33901   ACGAGTCGAGATGCTGGCAATGCAAGTGACCTGAGTTCAACACTAGTGAAAGTCTGTCAG
*****

isotig33900   CCAATGGGAATTCGTGTCGACCAACCACGAACATGCCAGTTGCCTGATGATAGTACAAC
isotig33901   CCAATGGGAATTCGTGTCGACCAACCACGAACATGCCAGTTGCCTGATGATAGTACAAC
*****

isotig33900   ACATTCGTACGAGCACTGAAGGAATCTATTGACGACACGGTTTGCATGGTGGTGATAATA
isotig33901   ACATTCGTACGAGCACTGAAGGAATCTATTGACGACACGGTTTGCATGGTGGTGATAATA
*****

isotig33900   CTACCCACAAACAGGAAGGATCGTTATGATGCCATCAAACCATCTGCTGTGTTGAGCAG
isotig33901   CTACCCACAAACAGGAAGGATCGTTATGATGCCATCAAACCATCTGCTGTGTTGAGCAG
*****

isotig33900   CCAGTCCAAGCCAAGTTGTATTGGCTCGTACTTTATCCAAGAAGCAGATGTTGATGTCCT
isotig33901   CCAGTCCAAGCCAAGTTGTATTGGCTCGTACTTTATCCAAGAAGCAGATGTTGATGTCCT
*****

isotig33900   GTGGCAACCAAATTGCCATTCAATTGAACGTCAAATGGGCGGCGAAGTATGGGCGCTG
isotig33901   GTGGCAACCAAATTGCCATTCAATTGAACGTCAAATGGGCGGCGAAGTATGGGCGCTG
*****

isotig33900   GATATACCTATCAAGAATGTCATGATTATTGGAATTGATACTTATCACGATTCTGCCAAG
isotig33901   GATATACCTATCAAGAATGTCATGATTATTGGAATTGATACTTATCACGATTCTGCCAAG
*****

isotig33900   AAAGGTCGATCTGTTGGAGCATTCAATGCCAGCATGAACTCAACCTTTACACGTTATTAT
isotig33901   AAAGGTCGATCTGTTGGAGCATTCAATGCCAGCATGAACTCAACCTTTACACGTTATTAT
*****

isotig33900   TCACGATGTGCATTCCAATCAAGTCACGAGGAACTACAGAATGCTCTGAAAATATGTATG
isotig33901   TCACGATGTGCATTCCAATCAAGTCACGAGGAACTACAGAATGCTCTGAAAATATGTATG
*****

isotig33900   CAGAGTGCTTTGAAGAATTACCATGCCGTTAATGGAGTTCTGCCTGAGAAAAGTCATAGTC
isotig33901   CAGAGTGCTTTGAAGAATTACCATGCCGTTAATGGAGTTCTGCCTGAGAAAAGTCATAGTC
*****

isotig33900   TTCCGTGATGGAGTTGGGGATGGACAGCTGGCAACTGTTTACGAGCATGAAGTTCGTCAG
isotig33901   TTCCGTGATGGAGTTGGGGATGGACAGCTGGCAACTGTTTACGAGCATGAAGTTCGTCAG
*****

isotig33900   CTGACTGACTGCTTTCAGGCACCTGGACCAGATTACAGTCCAAAGTTTGCAGTAATCGTG
isotig33901   CTGACTGACTGCTTTCAGGCACCTGGACCAGATTACAGTCCAAAGTTTGCAGTAATCGTG
*****

isotig33900   GTCAAGAAGCGCATCAACTCCCGTTTCTTCATGACAGAGAGGGGCCAAACTACAAATCCA
isotig33901   GTCAAGAAGCGCATCAACTCCCGTTTCTTCATGACAGAGAGGGGCCAAACTACAAATCCA
*****

isotig33900   CGTGCAGGAACCATCATTGACACAGAGGCAACGCGGCCAGAATGGTACGATTTCCTCTTG
isotig33901   CGTGCAGGAACCATC-----
*****

isotig33900   GTGAGTCAGTCGGTTCGTCAGGGAACGGTTGCTCCAACCTACTACAAATGTCATCTACGAT
isotig33901   -----

isotig33900   ACAACTGGTTTCAAGCCGGATCACATGCAACGTTTGGCTTACAAACTGTGCCATTTGTAC
isotig33901   -----
```

isotig33900 TACAAC TGGCAGGGAACGATT CGTGTGCCGGCGCCTTGCCAGTATGCTCACAAAATGGCA  
isotig33901 -----

isotig33900 TTCCTGGTTGGTCAGTCTCTTCATAGAGATCCATCTCTGCGCCTAGCCGACAAGCTGTTC  
isotig33901 -----TCTGCGCCTAGCCGACAAGCTGTTC  
\*\*\*\*\*

isotig33900 TTCCTGTAGTATCTCTGACTCGGCTGCTGAACTGTTACACTGTCGATGCTGACGTGCTGA  
isotig33901 TTCCTGTAGTATCTCTGACTCGGCTGCTGAACTGTTACACTGTCGATGCTGACGTGCTGA  
\*\*\*\*\*

isotig33900 ATATCAAGATTTTATTTTCATCTCAGTTAGCAGTTGATTCGCGTTGTTGTGATAATTGAT  
isotig33901 ATATCAAGATTTTATTTTCATCTCAGTTAGCAGTTGATTCGCGTTGTTGTGATAATTGAT  
\*\*\*\*\*

isotig33900 CTA CTTTGATGATTAATACTTTTTTTCAATGTGTTCAATCGTAATACAGTGGACTGTAGT  
isotig33901 CTA CTTTGATGATTAATACTTTTTTTCAATGTGTTCAATCGTAATACAGTGGACTGTAGT  
\*\*\*\*\*

isotig33900 TTTTAAATGTACCATTGGATTTGTATGGTTTACGGAGAAGATGCTCAGCTTTCTTGCC  
isotig33901 TTTTAAATGTACCATTGGATTTGTATGGTTTACGGAGAAGATGCTCAGCTTTCTTGCC  
\*\*\*\*\*

isotig33900 GTTTGAGGAAGTGTTCGGAATGATGGTGTGCGCCATTACAAGAGGCTGACATTCACATC  
isotig33901 GTTTGAGGAAGTGTTCGGAATGATGGTGTGCGCCATTACAAGAGGCTGACATTCACATC  
\*\*\*\*\*

isotig33900 TATGTATTTT TAGCTAAGTCGTGCCGAGTTGTTGGACTGTTGCAATACACGTTGTCTT  
isotig33901 TATGTATTTT TAGCTAAGTCGTGCCGAGTTGTTGGACTGTTGCAATACACGTTGTCTT  
\*\*\*\*\*

isotig33900 GAATGCACCTATGTGTATTTTCTCAAGTATTGAAGCCATCGGAAAGGAACTTTGATCGAG  
isotig33901 GAATGCACCTATGTGTATTTTCTCAAGTATTGAAGCCATCGGAAAGGAACTTTGATCGAG  
\*\*\*\*\*

isotig33900 TTCACGTTGATGTCTGAATATTTTCTACTAGCTGTTCCGACGTTAGTGTAGTTTGT  
isotig33901 TTCACGTTGATGTCTGAATATTTTCTACTAGCTGTTCCGACGTTAGTGTAGTTTGT  
\*\*\*\*\*

isotig33900 GATACGTTAACATCCATTTCTGTCAGTATTGTTGATAACGCATCTCTAGTGCACACATT  
isotig33901 GATACGTTAACATCCATTTCTGTCAGTATTGTTGATAACGCATCTCTAGTGCACACATT  
\*\*\*\*\*

isotig33900 GCTGCAGTAGCACGTGCGTCTCGCCTGCATTTTTTTGACAAATTTGTTGCGATAGATT  
isotig33901 GCTGCAGTAGCACGTGCGTCTCGCCTGCATTTTTTTGACAAATTTGTTGCGATAGATT  
\*\*\*\*\*

isotig33900 CTGTTTGAGATTTGTGAAGTAGCGGATGTTATGCATAAAATAATCTGCATCCTGATGCAT  
isotig33901 CTGTTTGAGATTTGTGAAGTAGCGGATGTTATGCATAAAATAATCTGCATCCTGATGCAT  
\*\*\*\*\*

isotig33900 AATTGTTCTTGGTGGTGTGATTTAAGAGATGCCCAACTGATTTAAGAGATGCCCAACTG  
isotig33901 AATTGTTCTTGGTGGTGTGATTTAAGAGATGCCCAACTGATTTAAGAGATGCCCAACTG  
\*\*\*\*\*

isotig33900 TTGAAACTATTTTCATCCTGTTTATACCGGGCATTAAACTGCATTTACGTCGCATACGA  
isotig33901 TTGAAACTATTTTCATCCTGTTTATACCGGGCATTAAACTGCATTTACGTCGCATACGA  
\*\*\*\*\*

isotig33900 TGAATTGATGATTTGTTTGGAGTTGAAAAA  
isotig33901 TGAATTGATGATTTGTTTGGAGTTGAAAAA  
\*\*\*\*\*

## B Isogroup03233 – putative *frizzled* gene

```
isotig19223 -----
isotig19224 CCCGTAGTCGACGCGTCTGCAACATGTCCAGCGTTTTCCAAGTACGACAACCTGTTGCAG
isotig19225 -----
isotig19226 -----
isotig19227 CCCGTAGTCGACGCGTCTGCAACATGTCCAGCGTTTTCCAAGTACGACAACCTGTTGCAG
isotig19228 -----

isotig19223 -----
isotig19224 ATGTCAACGTTGATGATTTGACGTTTTTCGTACGACAGCAACACTTGTGCGAGTCGTTTCAT
isotig19225 -----
isotig19226 -----
isotig19227 ATGTCAACGTTGATGATTTGACGTTTTTCGTACGACAGCAACACTTGTGCGAGTCGTTTCAT
isotig19228 -----

isotig19223 -----
isotig19224 GTCGACATGGCTGCATGTTGCCGTATTGATCGTAAACTGCTATCTTAACCGACCGAGCGA
isotig19225 -----
isotig19226 -----
isotig19227 GTCGACATGGCTGCATGTTGCCGTATTGATCGTAAACTGCTATCTTAACCGACCGAGCGA
isotig19228 -----

isotig19223 -----
isotig19224 TATTCGGCGCGAAGTGCCTTTGCTCGATTTTATGTGACGAGCTGCGTTTGACCGATTTT
isotig19225 -----
isotig19226 -----
isotig19227 TATTCGGCGCGAAGTGCCTTTGCTCGATTTTATGTGACGAGCTGCGTTTGACCGATTTT
isotig19228 -----

isotig19223 -----CCGAAGTGTTCAGTTTTATCGCTGTCGCTACAAACG
isotig19224 TGTGCGGGTTGTGTTCCGAAA---AACTGTTTCAAGTTTTATCGCTGTCGCTACAAACG
isotig19225 -----
isotig19226 -----CCGAAGTGTTCAGTTTTATCGCTGTCGCTACAAACG
isotig19227 TGTGCGGGTTGTGTTCCGAAA---AACTGTTTCAAGTTTTATCGCTGTCGCTACAAACG
isotig19228 -----

isotig19223 TAGGCTACGCACGCACGGTCTGGCGGGCGTTTCGCTTGGAGCGTCGCTCGCCTTCGAAACA
isotig19224 TAGGCTACGCACGCACGGTCTGGCGGGCGTTTCGCTTGGAGCGTCGCTCGCCTTCGAAACA
isotig19225 -----
isotig19226 TAGGCTACGCACGCACGGTCTGGCGGGCGTTTCGCTTGGAGCGTCGCTCGCCTTCGAAACA
isotig19227 TAGGCTACGCACGCACGGTCTGGCGGGCGTTTCGCTTGGAGCGTCGCTCGCCTTCGAAACA
isotig19228 -----

isotig19223 TCGAGATAACACATACGTACACAAAGATAGCAGCGAAATAATGCGGTCGTCGTCGTCGT
isotig19224 TCGAGATAACACATACGTACACAAAGATAGCAGCGAAATAATGCGGTCGTCGTCGTCGTCGT
isotig19225 -----
isotig19226 TCGAGATAACACATACGTACACAAAGATAGCAGCGAAATAATGCGGTCGTCGTCGTCGTCGT
isotig19227 TCGAGATAACACATACGTACACAAAGATAGCAGCGAAATAATGCGGTCGTCGTCGTCGTCGT
isotig19228 -----

isotig19223 -GATCAGCTGGAATCCGTGTACTTGCCTGCTTCTTAATCCACTGCCATCCTGCAGTAT
isotig19224 -GATCAGCTGGAATCCGTGTACTTGCCTGCTTCTTAATCCACTGCCATCCTGCAGTAT
isotig19225 -----
isotig19226 -----
isotig19227 -----
isotig19228 -----

isotig19223 CAGCGGACTTGAGTCAATATGGAATCGAGTTATGCAGCACCATCGGACGTTTGGCAGCC
isotig19224 CAGCGGACTTGAGTCAATATGGAATCGAGTTATGCAGCACCATCGGACGTTTGGCAGCC
isotig19225 -----
isotig19226 -----
isotig19227 -----
isotig19228 -----
```

isotig19223 AGCGCTCTTTTGCTTCAGCTGTTACTGACCGGCAGTCACCAGATGCCGTCCGCTGTCGGT  
isotig19224 AGCGCTCTTTTGCTTCAGCTGTTACTGACCGGCAGTCACCAGATGCCGTCCGCTGTCGGT  
isotig19225 -----  
isotig19226 -----  
isotig19227 -----  
isotig19228 -----

isotig19223 TTCGGTTCGCAGCAACAGCAACAGCAGCAACAACAGCCGCAGCAACAGCAGCAGCATTCCG  
isotig19224 TTCGGTTCGCAGCAACAGCAACAGCAGCAACAACAGCCGCAGCAACAGCAGCAGCATTCCG  
isotig19225 -----  
isotig19226 -----  
isotig19227 -----  
isotig19228 -----

isotig19223 ATGATGTCGCACCATCACCTGC-----  
isotig19224 ATGATGTCGCACCATCACCTGC-----  
isotig19225 -----CGTTCCCTCGTGTGTATTTCTTCGGCATGGCTGGATC  
isotig19226 -----  
isotig19227 -----  
isotig19228 -----CGTTCCCTCGTGTGTATTTCTTCGGCATGGCTGGATC

isotig19223 -----  
isotig19224 -----  
isotig19225 GCTCTGGTGGGTCGCTCTGACGGTCGCATTTACTTGTTCGGCCGGACGGAAGTGGAGTCCG  
isotig19226 -----  
isotig19227 -----  
isotig19228 GCTCTGGTGGGTCGCTCTGACGGTCGCATTTACTTGTTCGGCCGGACGGAAGTGGAGTCCG

isotig19223 -----  
isotig19224 -----  
isotig19225 AGAAGCGATCGAAGCGCGGTCGGCCTACTTTACGTCGCGCGGCTGGACACTTCCGGCCGT  
isotig19226 -----  
isotig19227 -----  
isotig19228 AGAAGCGATCGAAGCGCGGTCGGCCTACTTTACGTCGCGCGGCTGGACACTTCCGGCCGT

isotig19223 -----  
isotig19224 -----  
isotig19225 GAAAACGATCGCCATATTGGCGCTTCATCGTGTTCGACGCGGACGAATTGACGGGACTCTG  
isotig19226 -----  
isotig19227 -----  
isotig19228 GAAAACGATCGCCATATTGGCGCTTCATCGTGTTCGACGCGGACGAATTGACGGGACTCTG

isotig19223 -----  
isotig19224 -----  
isotig19225 TTACGTCGGCAACGTCGACCGAGACGCGCTGGTCGCCTTCGTTGTCGTTCCGCTGTTGGC  
isotig19226 -----  
isotig19227 -----  
isotig19228 TTACGTCGGCAACGTCGACCGAGACGCGCTGGTCGCCTTCGTTGTCGTTCCGCTGTTGGC

isotig19223 -----  
isotig19224 -----  
isotig19225 CTATCTCATCGTCGGCATAGCGTTTATCGCTGCAGGTTTCACTGCTATGTTCCACATCCG  
isotig19226 -----  
isotig19227 -----  
isotig19228 CTATCTCATCGTCGGCATAGCGTTTATCGCTGCAGGTTTCACTGCTATGTTCCACATCCG

isotig19223 -----  
isotig19224 -----  
isotig19225 CAAAGACCTTCTGCGTGGCGGCAGCGGCGAGAACGACGACGAAACATAATCGCTCCGGG  
isotig19226 -----  
isotig19227 -----  
isotig19228 CAAAGACCTTCTGCGTGGCGGCAGCGGCGAGAACGACGACGAAACATAATCGCTCCGGG

isotig19223 -----  
isotig19224 -----  
isotig19225 AGGAACGAAACTATTCGGAAGTTGAAAACTAATGGCAAAAATCGGCGTGTCTCTGTG  
isotig19226 -----  
isotig19227 -----  
isotig19228 AGGAACGAAACTATTCGGAAGTTGAAAACTAATGGCAAAAATCGGCGTGTCTCTGTG

isotig19223 -----  
isotig19224 -----  
isotig19225 CTCTATAACCGTACCGGCGACGTGTGTCGTTGCGTGTTCCTGTACCGTCGCATGAACATG  
isotig19226 -----  
isotig19227 -----  
isotig19228 CTCTATAACCGTACCGGCGACGTGTGTCGTTGCGTGTTCCTGTACCGTCGCATGAACATG

isotig19223 -----  
isotig19224 -----  
isotig19225 GACATCTGGCGCAGCGAGCTGCCGCTGGCTTGGACTGTGGCGCCCTCGTAAGCATCTG  
isotig19226 -----  
isotig19227 -----  
isotig19228 GACATCTGGCGCAGCGAGCTGCCGCTGGCTTGGACTGTGGCGCCCTCGTAAGCATCTG

isotig19223 -----  
isotig19224 -----  
isotig19225 AGCTTAGTAGGGTCTGAAGACGAACCGGACTGCGAGCCTCTGAGGCAATCGATACCGCCG  
isotig19226 -----  
isotig19227 -----  
isotig19228 AGCTTAGTAGGGTCTGAAGACGAACCGGACTGCGAGCCTCTGAGGCAATCGATACCGCCG

isotig19223 -----  
isotig19224 -----  
isotig19225 ATAGAGGTCGAGATGCTGAGGTTGTTTCATGTTATTGGCGGGCGGAATGACCAGCTTCGTG  
isotig19226 -----  
isotig19227 -----  
isotig19228 ATAGAGGTCGAGATGCTGAGGTTGTTTCATGTTATTGGCGGGCGGAATGACCAGCTTCGTG

isotig19223 -----  
isotig19224 -----  
isotig19225 TGGATCTGCTCGAGGAAAACATTTTGGAGCTGGTACCGATTTTGGACGCGAAGTGGAGGA  
isotig19226 -----  
isotig19227 -----  
isotig19228 TGGATCTGCTCGAGGAAAACATTTTGGAGCTGGTACCGATTTTGGACGCGAAGTGGAGGA

isotig19223 -----  
isotig19224 -----  
isotig19225 CGAATTGGGTCCCGACATCTGTGCCAGGCGCCAGTGCTCACCAAAACAGACCGGTGCGA  
isotig19226 -----  
isotig19227 -----  
isotig19228 CGAATTGGGTCCCGACATCTGTGCCAGGCGCCAGTGCTCACCAAAACAGACCGGTGCGA

isotig19223 -----  
isotig19224 -----  
isotig19225 TCAGATGCGGCAGCGCTACCGTCGGCGGTGGGGGATTGCGTTTAGCTACGCCAGCCACCG  
isotig19226 -----  
isotig19227 -----  
isotig19228 TCAGATGCGGCAGCGCTACCGTCGGCGGTGGGGGATTGCGTTTAGCTACGCCAGCCACCG

isotig19223 -----  
isotig19224 -----  
isotig19225 GATCACGTGATATTCACACCGGGCTGC-TTCAGCAGCCGTCGTCGTCGTCGT---CTG  
isotig19226 -----CTG  
isotig19227 -----CTG  
isotig19228 GATCACGTGATATTCACACCGGGCTGC-----

isotig19223 -----  
isotig19224 -----  
isotig19225 CAGCTGGAAAATGTGAACGGATCAGGATACCTCTATGTAAGGATATGAAATACAATATGA  
isotig19226 CAGCTGGAAAATGTGAACGGATCAGGATACCTCTATGTAAGGATATGAAATACAATATGA  
isotig19227 CAGCTGGAAAATGTGAACGGATCAGGATACCTCTATGTAAGGATATGAAATACAATATGA  
isotig19228 -----

isotig19223 -----  
isotig19224 -----  
isotig19225 CGCGGATGCCGAACCTGGTCGGTCAAACCTAAATCAAAGGACGCAGCGCTTCAGGTGCACG  
isotig19226 CGCGGATGCCGAACCTGGTCGGTCAAACCTAAATCAAAGGACGCAGCGCTTCAGGTGCACG  
isotig19227 CGCGGATGCCGAACCTGGTCGGTCAAACCTAAATCAAAGGACGCAGCGCTTCAGGTGCACG  
isotig19228 -----

isotig19223 -----  
isotig19224 -----  
isotig19225 AGTCCATACCGCTGATACAGTTCGGTTGTTCAAACCTGTTGAAGTTTTTCCTCTGTCTT  
isotig19226 AGTCCATACCGCTGATACAGTTCGGTTGTTCAAACCTGTTGAAGTTTTTCCTCTGTCTT  
isotig19227 AGTCCATACCGCTGATACAGTTCGGTTGTTCAAACCTGTTGAAGTTTTTCCTCTGTCTT  
isotig19228 -----

isotig19223 -----CTACCGGAAGTGCACACGTCTTATCCTG  
isotig19224 -----CTACCGGAAGTGCACACGTCTTATCCTG  
isotig19225 TGTACGCACCAATGTGTACCGAACCAAGTCG-----  
isotig19226 TGTACGCACCAATGTGTACCGAACCAAGTCG-----  
isotig19227 TGTACGCACCAATGTGTACCGAACCAAGTCG-----  
isotig19228 -----CTACCGGAAGTGCACACGTCTTA-CCTG

isotig19223 CATTCGAACAGTATCAGACTCGAATTTGATTGGTGTATTTATGTATTTTGTCCTATAA  
isotig19224 CATTCGAACAGTATCAGACTCGAATTTGATTGGTGTATTTATGTATTTTGTCCTATAA  
isotig19225 -----  
isotig19226 -----  
isotig19227 -----  
isotig19228 CATTCGAACAGTATCAGACTCGAATTTGATTGGTGTATTTATGTATTTTGTCCTATAA

isotig19223 TTGTACGTAGCACGGGATTGATCATGGAGTTGTTACGG  
isotig19224 TTGTACGTAGCACGGGATTGATCATGGAGTTGTTACGG  
isotig19225 -----  
isotig19226 -----  
isotig19227 -----  
isotig19228 TTGTACGTAGCACGGGATTGATCATGGAGTTGTTACGG
