# Supplementary material for: Transcriptome characterization via 454 pyrosequencing of the annelid Pristina leidyi, an emerging model for studying the evolution of regeneration
Source: PubMed Central journal article supplement (PMC3464666; doi:10.1186/1471-2164-13-287), 2012-06-29
Supplement: 1471-2164-13-287-S5.pdf [file 1471-2164-13-287-S5.pdf]

## **Additional File 5 – Primer sequences**

### **A. Primers for cDNA library construction (trimmed from raw sequences prior to sequence assembly)**

modified oligo-dT reverse transcription primer:

AAGCAGTGGTATCAACGCAGAGTACTTTTGTTTTTTTTTCTTT  
TTTTTTTVN

MINT 5' PlugOligo adaptor:

AAGCAGTGGTATCAACGCAGAGTACGGGGG-P

MINT M1 PCR primer:

AAGCAGTGGTATCAACGCAGAGT

### **B. 454 sequencing adaptors (trimmed from raw sequences prior to sequence assembly)**

454 A1        CCATCTCATCCCTGCGTGTCTCCGACTCAG

454 B1        CCTATCCCCTGTGTGCCTTGGCAGTCTCAG

### **C. Primers for PCR assay of metabolic activity in dried Spirulina food (Additional File 2)**

rbcL-A+        AACCTCCATCGTGGGTAACG

rbcL-C-        CAGCGGTGAAGAAGTCGTGC

cpc-D+        AGTCGCCTAGGAATCAGAGC

cpc-E-        GTTGGGTAGCAAACCACGG

atub-A+        ACCCACACCACTCTGGAGCG

atub-B-        TGATTTTCAGCAACGGTGAGC

### **D. Primers for qPCR assays of normalization efficiency (Figure 2)**

PRiIe- $\beta$ actin-Q1+    ACGCCAACACCGTCATGTCT

PRiIe- $\beta$ actin-Q2-    GATCCAGACGGAGTATTTGC

PRiIe- $\alpha$ tub-Q1+    CTTACACCAACCTGAACCGT

PRiIe- $\alpha$ tub-Q2-    CTGGAACTCGGTCAGATCGA

PRiIe-wnt1Q1+    TCGGTGACGTCATCAAAGAC

PRiIe-wnt1Q2-    AGGCTGACGATGGTGAGAGT

PRiIe-otx2Q1+    CGGTATCCGGACATATTCAC

PRiIe-otx2Q2-    GGAAGTACTGCTCAACTG

PRiIe-hoxZ(ST42)-Q1+    TCGAAATCGCTGCCTCGCTA

PRiIe-hoxZ(ST42)-Q2-    GGCACCCGATGAAGATCCAT

## E. Primers for validation of contigs and isotigs (Figure 5)

### Isogroup08478 (*piwi-like*):

Piwi\_contigA+ ATAATCCAGGCAAATCAACGATC  
Piwi\_contigA- GATGGTTCCTGCACGTGGATTTG  
Piwi\_contigB+ ATTGACACAGAGGCAACGCGG  
Piwi\_contigB- GATGGATCTCTATGAAGAGACTG  
Piwi\_contigC+ TCTGCGCCTAGCCGACAAGCT  
Piwi\_contigC- CTCCAAAACAATCATCAATTCATCG

### Isogroup03233 (*frizzled*):

Fz\_contigA+ CCCGTAGTCGACGCGTCTGC  
Fz\_contigA- TTTCGGAACACAACCCGCACA  
Fz\_contigA2+ TGTCCAGCGTTTTCCAAGTAC  
Fz\_contigA2- GTCAAACGCAGCTCGTCGAC  
Fz\_contigB+ CTGTTTCAAGTTTTATCGCTGTC  
Fz\_contigB- ACGACGACGACGACCGCATT  
Fz\_contigB2+ TAGGCTACGCACGCACGGTC  
Fz\_contigB2- TTCGCTGCTATCTTTGTGTGAC  
Fz\_contigC+ GATCAGCTGGAATCCGTGTACT  
Fz\_contigC- GCAGGTGATGGTGCACATC  
Fz\_contigC2+ CGCTGCTTCTTAATCCACTG  
Fz\_contigC2- CGAATGCTGCTGCTGTTGCTG  
Fz\_contigD+ CGTTCCTCGTGCTGTATTTCTTC  
Fz\_contigD- GCAGCCGCGGTGTGAATATCAC  
Fz\_contigD2+ TTCGGCATGGCTGGATCGCT  
Fz\_contigD2- GTGGCTGGCGTAGCTAAACG  
Fz\_contigE+ CTGCAGCTGGAAAATGTGAACG  
Fz\_contigE- CGACTTGTTCCGGTACACATTG  
Fz\_contigE2+ GATCACGATACCTCTATGTAAGG  
Fz\_contigE2- TGGTGCGTACAAAGAACAGAGGA  
Fz\_contigF+ CTACCGGAAGTGCGACACGTC  
Fz\_contigF- CCGTAACAACCTCCATGATCAATC

**F. Primers for *in situ* hybridization probe synthesis (Figure 7)**

*Pl-fzA* (isogroup23343):

|           |                         |
|-----------|-------------------------|
| Pl-fzA-A+ | CGTTCCTCGTGCTGTATTTCTTC |
| Pl-fzA-B- | TAAGATTCCGAAGTGATTCCGG  |

*Pl-β-cat* (isogroup01340):

|             |                      |
|-------------|----------------------|
| Pl-β-cat-Q+ | GTAGATTCAGGAATTCATTC |
| Pl-β-cat-T- | GTAAGGCACATATCGTTGGC |
